# Supplementary material for: USP18 negatively regulates NF-κB signaling by targeting TAK1 and NEMO for deubiquitination through distinct mechanisms
Source: PubMed Central journal article supplement (PMC4523862; doi:10.1038/srep12738), 2015-08-04
Supplement: srep12738-s1.pdf [file srep12738-s1.pdf]

---

## Supplementary material

### **USP18 negatively regulates NF- $\kappa$ B signaling by targeting TAK1 and NEMO for deubiquitination through distinct mechanisms**

Zhifen Yang<sup>1,2+</sup>, Huifang Xian<sup>1+</sup>, Jiajia Hu<sup>1</sup>, Shuo Tian<sup>1</sup>, Yunfei Qin<sup>1</sup>, Rong-Fu Wang<sup>4\*</sup>  
and Jun Cui<sup>1,3\*</sup>

<sup>1</sup> Key Laboratory of Gene Engineering of the Ministry of Education, State Key Laboratory of Biocontrol, School of Life Sciences, <sup>2</sup> Zhongshan School of Medicine, <sup>3</sup> Collaborative Innovation Center of Cancer Medicine, Sun Yat-sen University, Guangzhou, P. R. China. <sup>4</sup>Houston Methodist Research Institute, Houston, Texas 77030, USA

\*Correspondence should be addressed to J.C. ([cuij5@mail.sysu.edu.cn](mailto:cuij5@mail.sysu.edu.cn)) and R.-F.W. ([rwang3@tmhs.org](mailto:rwang3@tmhs.org)).

<sup>†</sup>These authors contributed equally to this work.

**Figure S1**

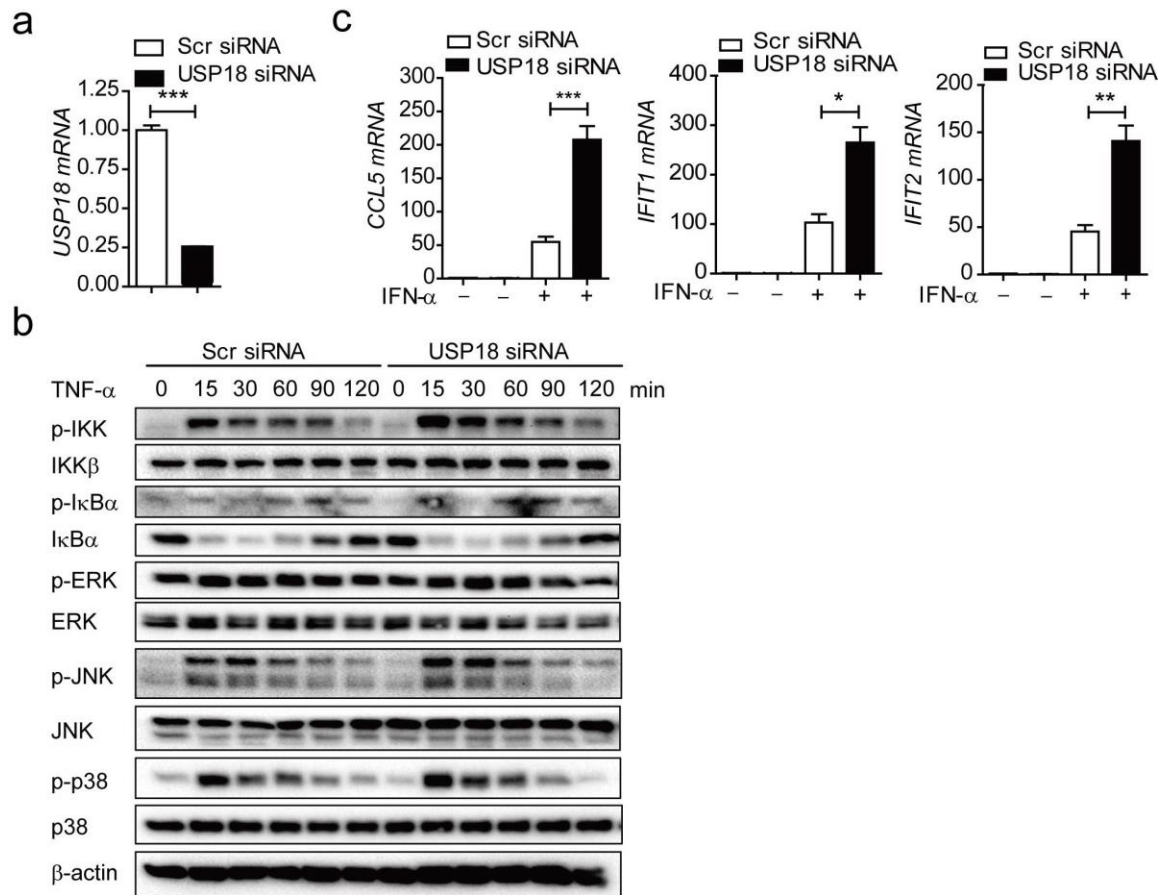

**Figure S1 | Knockdown of USP18 enhances activation of NF- $\kappa$ B signaling and expression of interferon-stimulated genes.** (a) Knockdown efficiency of USP18-specific siRNA in THP-1 derived macrophages. (b) THP-1 cells transfected with scramble (Scr) siRNA or USP18-specific siRNA, and then treated with TNF- $\alpha$  for the indicated time points. TNF $\alpha$ -induced IKK, I $\kappa$ B $\alpha$ , and MAPK (p38, JNK, and ERK) activation measured by immunoblot analysis with indicated antibodies. (c) USP18-mediated negative regulation of IFN- $\alpha$  induced gene expression. THP-1 derived macrophage cells transfected with Scr siRNA or USP18 siRNA 30 pmol/well for 48 hrs, followed by treatment with IFN- $\alpha$  (10ng/ml) for 6 hrs. Total mRNA harvested after treatment and ISG15, IFIT1, IFIT2 mRNA abundance analyzed by q-PCR. Data in a, c are presented as the means  $\pm$  SD of three independent experiments. \* $P < 0.05$ , \*\* $P < 0.01$ , and \*\*\* $P < 0.001$  versus cells transfected with scrambled siRNA (Student's t-test).

**Figure S2**

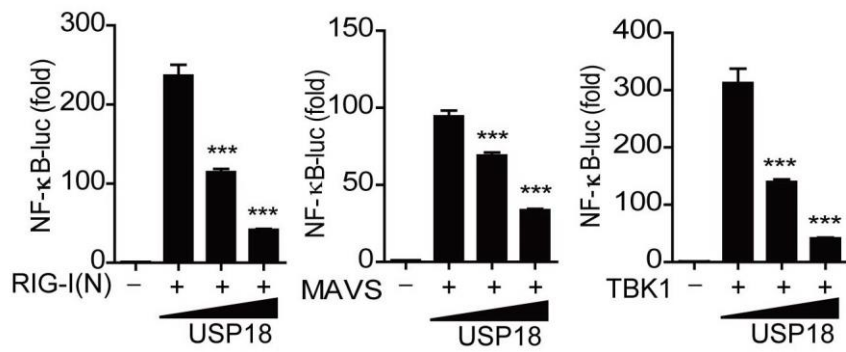

**Figure S2 | USP18 inhibits RIG-I (N)-, MAVS-, and TBK1- induced NF-κB activation.** Luciferase activity in HEK293T cells transfected with plasmid encoding a luciferase reporter for NF-κB (NF-κB-luc) together with empty vector or plasmids as indicated.

**Figure S3**

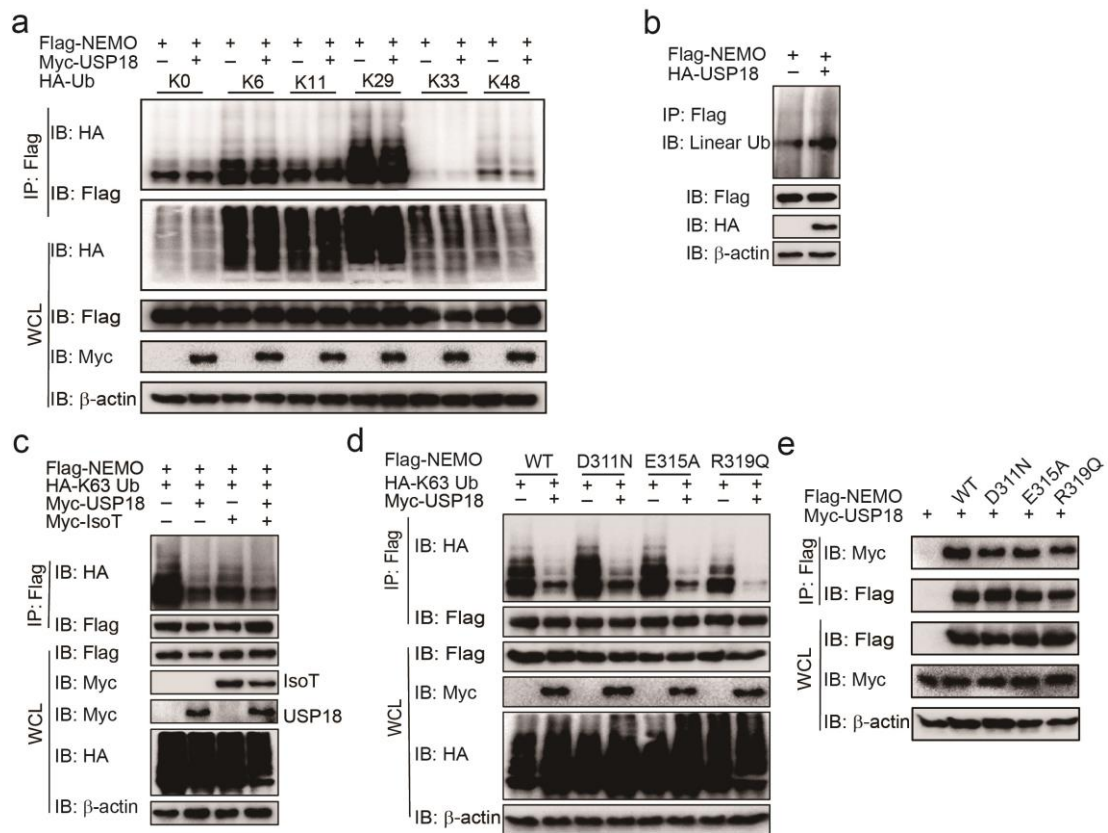

**Figure S3 | USP18 blocks covalent conjugated K63-linked polyubiquitin chains of NEMO.** (a) Lysates of 293T cells transfected with Flag-NEMO, HA-Ub and Myc-USP18 or EV immunoprecipitated with anti-Flag and immunoblotted with anti-HA. (b) USP18 does not block linear polyubiquitination of NEMO. Lysates of 293T cells transfected with plasmids were immunoprecipitated with anti-Flag and immunoblotted with anti-Linear Ub. (c) Lysates of 293T cells transfected with the indicated plasmids, immunoprecipitated with anti-Flag, and immunoblotted with anti-HA. (d) 293T cells transfected with HA-K63, Flag-NEMO mutants, and Myc-USP18 or EV, then immunoprecipitated with anti-Flag and immunoblotted with anti-HA. (e) Cell lysates from Flag-NEMO mutant- and Myc-USP18-transfected 293T cells immunoprecipitated with anti-Flag and immunoblotted with anti-Myc.

## FigureS4

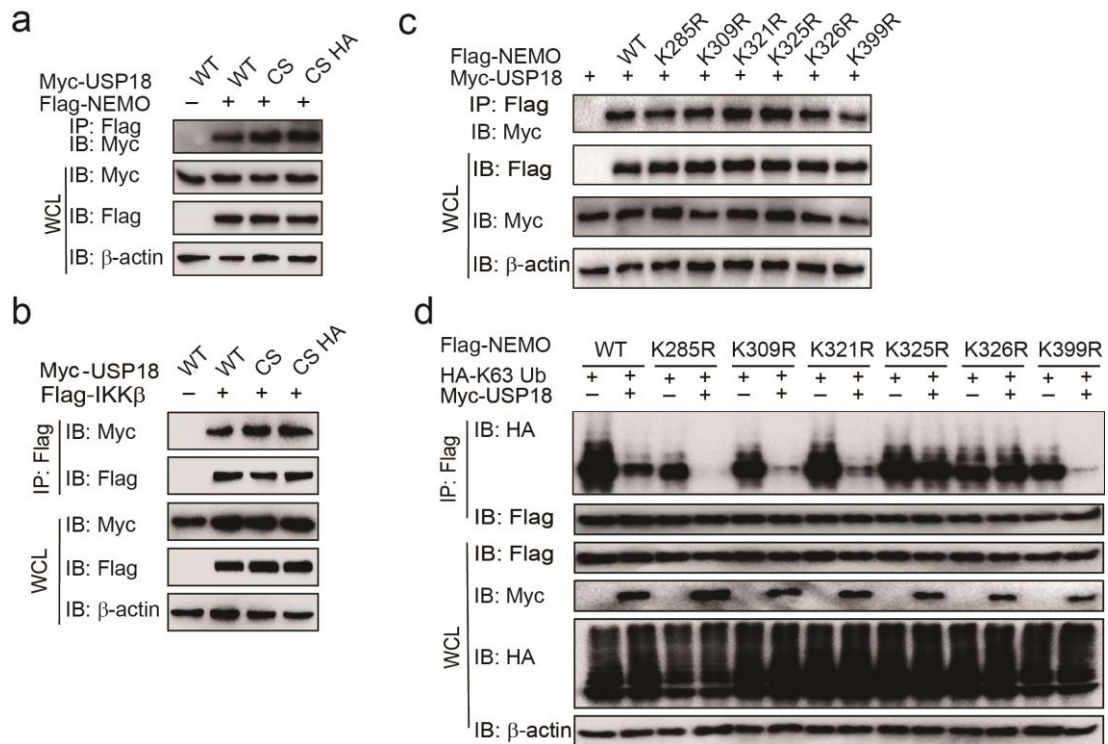

**Figure S4 | USP18 blocks K63-linked polyubiquitination of NEMO at Lys 325 and 326 residues.** (a-b) Co-immunoprecipitation and immunoblot analyses of 293T cells transfected with Flag-NEMO (a) or IKK $\beta$  (b) and Myc-USP18 (WT), Myc-USP18 (C64S), or Myc-USP18 (C64S H318A). (c) 293T cells transfected with Flag-NEMO mutants and Myc-USP18 or EV, immunoprecipitated with anti-Flag, and immunoblotted with anti-Myc. (d) Cell lysates collected from 293T cells transfected with Flag-NEMO mutants and HA-K63 Ub, empty vector (-), or Myc-USP18 were immunoprecipitated with anti-Flag and immunoblotted with anti-HA.

---

**Figure S5**

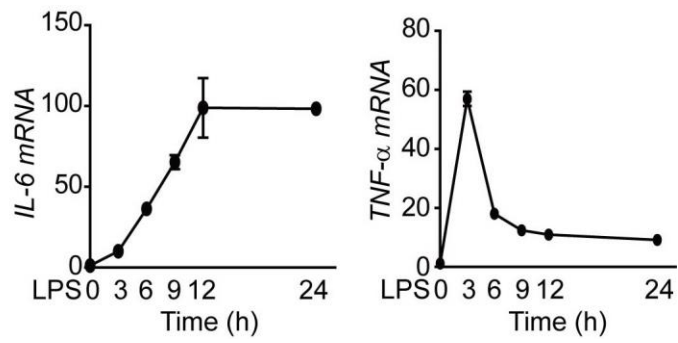

**Figure S5 | The expression of proinflammatory cytokines in response to LPS stimulation.** Relative IL-6 and TNF- $\alpha$  mRNA abundance in THP-1 cells stimulated with LPS for the indicated time points.
